# Supplementary material for: Improved SERS performance of a silver triangular nanoparticle/TiO2 nanoarray heterostructure and its application for food additive detection
Source: Royal Society of Chemistry journal article supplement (doi:10.1039/d2nj00388k), 2022-01-01
Supplement: d2nj00388k1.pdf [file d2nj00388k1.pdf]

## Supplementary information

### **Improved SERS performance of silver triangular nanoparticles/TiO<sub>2</sub> nanoarrays heterostructure and its application for food additives detection**

Zheng Lu<sup>a</sup>, Wenxian Wei<sup>b</sup>, Jingjing Yang<sup>a</sup>, Qin Xu<sup>a\*</sup>, Xiao-Ya Hu<sup>a\*</sup>

<sup>a</sup>School of Chemistry and Chemical Engineering, Yangzhou University,  
Yangzhou 225002, China;

<sup>b</sup> Testing Center of Yangzhou University, Yangzhou 225000, China;

E-mail: [xuqin@yzu.edu.cn](mailto:xuqin@yzu.edu.cn); [xyhu@yzu.edu.cn](mailto:xyhu@yzu.edu.cn)

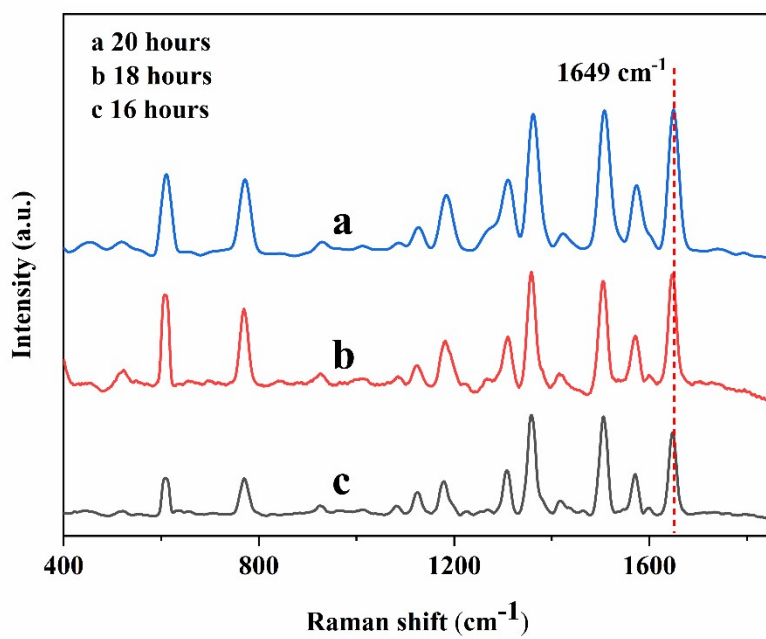

**Fig. S1.** SERS spectra of R6G ( $10^{-7}$  M) on AgNTs/TNA substrates composed of TNA obtained at different hydrothermal times of 16 hours (a), 18 hours (b), 20 hours (c).

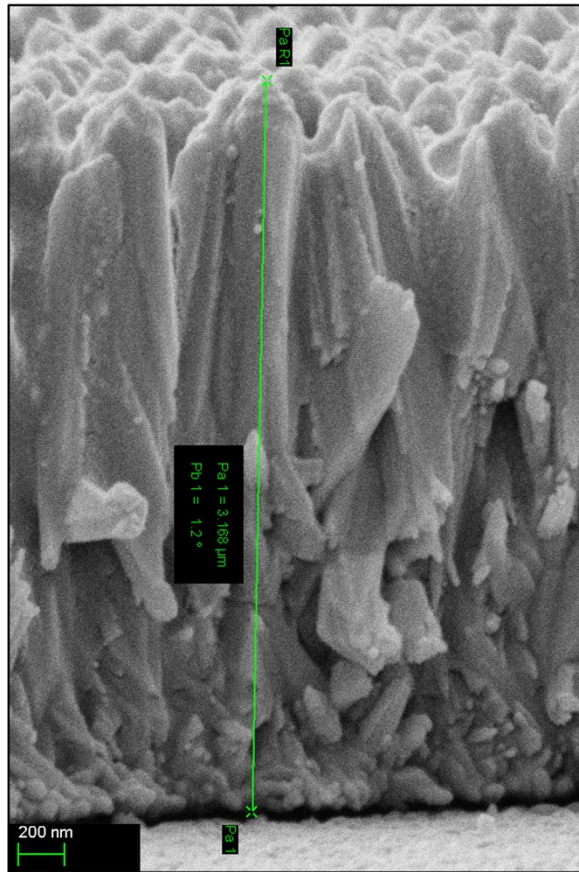

**Fig. S2.** SEM micrographs of TNA/FTO.

**Table S1** Comparison of different Raman Substrates for food additives detection

| Substrate                             | Analyte                      | LOD (M)                                                                           | LOD (M) for<br>Reals<br>samples          | Advantages                                     | Ref          |
|---------------------------------------|------------------------------|-----------------------------------------------------------------------------------|------------------------------------------|------------------------------------------------|--------------|
| Ag/TNA                                | R6G                          | $10^{-7}$                                                                         | -                                        | -                                              | 1            |
| Au@Ag/3D-Si                           | R6G                          | $10^{-8}$                                                                         | -                                        | -                                              | 2            |
| Gold<br>Nanorods                      | CV and<br>MG                 | $2.5 \times 10^{-9}$                                                              | $2.5 \times 10^{-9}$                     | Multiplex<br>detection                         | 3            |
| TiO <sub>2</sub> -Ag-GO<br>nanoarrays | CV,<br>R6G,<br>MG,<br>Thiram | CV ( $10^{-9}$ )<br>R6G ( $10^{-8}$ )<br>MG ( $10^{-7}$ )<br>Thiram ( $10^{-7}$ ) | CV ( $10^{-8}$ )<br>Thiram ( $10^{-6}$ ) | Multiplex<br>detection<br>and<br>recyclability | 4            |
| AgNTs/TNA                             | CV,<br>R6G,<br>MG,<br>Thiram | CV ( $10^{-9}$ )<br>R6G ( $10^{-7}$ )<br>MG ( $10^{-8}$ )<br>Thiram ( $10^{-7}$ ) | CV ( $10^{-8}$ )<br>MG ( $10^{-7}$ )     | Multiplex<br>detection<br>and<br>recyclability | This<br>work |

## Reference

1. H. Fang, C. X. Zhang, L. Liu, Y. M. Zhao and H. J. Xu, *Biosens. Bioelectron.*, 2015, **64**, 434-441.
2. C. Zhang, S. Z. Jiang, C. Yang, C. H. Li, Y. Y. Huo, X. Y. Liu, A. H. Liu, Q. Wei, S. S. Gao, X. G. Gao and B. Y. Man, *Sci Rep*, 2016, **6**, 25243.
3. X. Chen, T. H. D. Nguyen, L. Gu and M. Lin, *J Food Sci*, 2017, **82**, 1640-1646.
4. M. Zhang, H. Sun, X. Chen, H. Zhou, L. Xiong, W. Chen, Z. Chen, Z. Bao and Y. Wu, *J. Alloys Compd.*, 2021, **864**, 158189.
